# Supplementary material
Source: publisher site journal article supplement (https://zoologia.pensoft.net/article/19864/download/suppl/31/)

### Appendix S1: Alisphenoid strut

Figure showing the presence and absence of alisphenoid strut in *Calomys* specimens: (A-B) *Calomys expulsus* without alisphenoid strut (red arrow); (C-D) *Calomys tener* with alisphenoid strut (red arrow). Photos 1 and 3 were taken from Lund collection of extant mammals, Zoological Museum, Natural History Museum of Denmark, University of Copenhagen. Available at [http://www.zmuc.dk/VerWeb/lund/lund\\_mammals.html](http://www.zmuc.dk/VerWeb/lund/lund_mammals.html).

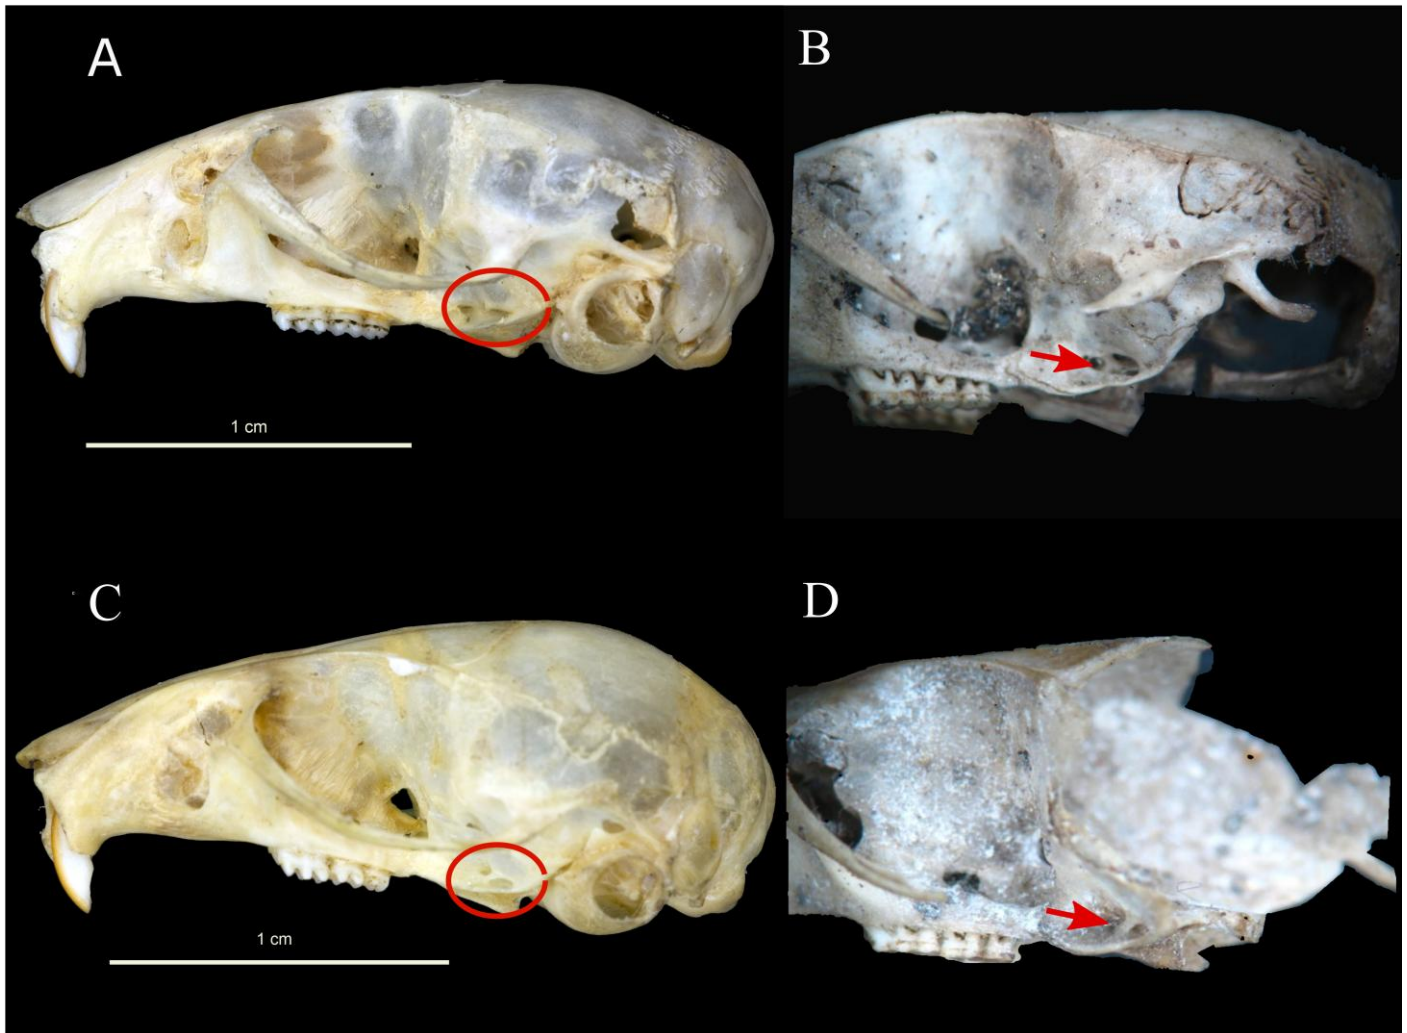

Supplement: Supplementary file 1
